# Supplementary material
Source: MDPI journal article supplement (https://www.mdpi.com/2071-1050/15/17/12803)
Supplement: s1 [file s1 › sustainability-2527990-supplementary.pdf]

**Survey for the population of Ecuador on pro-environmental behaviors, VBN Theory and Personality Traits.**

**Interviewer Name:** \_\_\_\_\_

**Survey Date:** \_\_\_\_\_

**City of the interviewed person:** \_\_\_\_\_

**Part A: Psycho-Social Constructs** (Select with an X your level of acceptance on the following items, considering that 1 is totally disagree and 5 totally agree).

| Constructs                                                         | Items                                                                                                                               | 1 | 2 | 3 | 4 | 5 |
|--------------------------------------------------------------------|-------------------------------------------------------------------------------------------------------------------------------------|---|---|---|---|---|
| External Influences (8 items)<br>You would generate less waste if: | 1. You had to pay for the food you waste?                                                                                           |   |   |   |   |   |
|                                                                    | 2. You were better informed of the monetary value of food waste?                                                                    |   |   |   |   |   |
|                                                                    | 3. The packaging was better?                                                                                                        |   |   |   |   |   |
|                                                                    | 4. You were better informed of the environmental impacts of food waste?                                                             |   |   |   |   |   |
|                                                                    | 5. You were better informed of the social impacts of food waste?                                                                    |   |   |   |   |   |
|                                                                    | 6. The portions in restaurants were smaller?                                                                                        |   |   |   |   |   |
|                                                                    | 7. The food was more expensive?                                                                                                     |   |   |   |   |   |
|                                                                    | 8. There were taxes for the food?                                                                                                   |   |   |   |   |   |
| New Environmental Paradigm (11 items)                              | 1. I feel embarrassed if I do not separate my household garbage according to the regulations, even if no one is aware of my action. |   |   |   |   |   |
|                                                                    | 2. I feel guilty when I throw away food scraps.                                                                                     |   |   |   |   |   |
|                                                                    | 3. I am willing to go further in my habits to avoid waste on a regular basis.                                                       |   |   |   |   |   |
|                                                                    | 4. I feel it is my responsibility to help the environment in the best possible way.                                                 |   |   |   |   |   |
|                                                                    | 5. I feel an obligation to buy organic products whenever possible.                                                                  |   |   |   |   |   |
|                                                                    | 6. I feel a moral obligation to protect the environment.                                                                            |   |   |   |   |   |
|                                                                    | 7. I feel that I must protect the environment.                                                                                      |   |   |   |   |   |
|                                                                    | 8. I think it is important that people in general protect the environment.                                                          |   |   |   |   |   |
|                                                                    | 9. I feel that I must do something to help future generations.                                                                      |   |   |   |   |   |
|                                                                    | 10. Due to my own values/principles, I feel an obligation to behave in an environmentally friendly manner.                          |   |   |   |   |   |
|                                                                    | 11. I must do what I can to conserve natural resources.                                                                             |   |   |   |   |   |

|                                           |                                                                                                                                       |  |  |  |  |  |
|-------------------------------------------|---------------------------------------------------------------------------------------------------------------------------------------|--|--|--|--|--|
| Awareness of Consequences<br>(6 items)    | 1. I believe that the waste problem represents a threat to my health and that of my family.                                           |  |  |  |  |  |
|                                           | 2. I believe that the excessive generation of waste and the disposal of all of it on earth will cause serious environmental problems. |  |  |  |  |  |
|                                           | 3. I believe that the risks associated with waste problems are real and serious.                                                      |  |  |  |  |  |
|                                           | 4. The waste of resources will be a problem for my family and my descendants.                                                         |  |  |  |  |  |
|                                           | 5. The waste of resources will be a problem for the country as a whole.                                                               |  |  |  |  |  |
|                                           | 6. The waste of resources will be a problem for other species of plants and animals.                                                  |  |  |  |  |  |
| Ascription of Responsibility<br>(3 items) | 1. I think I am responsible for taking care of the waste I generate.                                                                  |  |  |  |  |  |
|                                           | 2. I suppose that everyone is obliged to solve the problems caused by waste.                                                          |  |  |  |  |  |
|                                           | 3. All members of society must cooperate to solve waste problems.                                                                     |  |  |  |  |  |
| Personal Norms<br>(5 items)               | 1. I believe that waste separation helps reduce waste from earth.                                                                     |  |  |  |  |  |
|                                           | 2. I believe that waste separation helps reduce negative impacts on the environment.                                                  |  |  |  |  |  |
|                                           | 3. I believe that waste separation generates economic benefits.                                                                       |  |  |  |  |  |
|                                           | 4. My waste separation behavior will have a significant educational effect on my children.                                            |  |  |  |  |  |
|                                           | 5. Waste separation has positive effects on residents' perception of saving resources and protecting the environment.                 |  |  |  |  |  |
| Avoider Behavior<br>(6 items)             | 1. You avoid a product if it comes in a container that has aerosols.                                                                  |  |  |  |  |  |
|                                           | 2. You avoid a product if it has been tested in animals.                                                                              |  |  |  |  |  |
|                                           | 3. You avoid products derived from endangered animal species.                                                                         |  |  |  |  |  |
|                                           | 4. You avoid a product if it is a well-known environmental pollutant.                                                                 |  |  |  |  |  |
|                                           | 5. You avoid a product if the packaging comes from an environmental damaging material.                                                |  |  |  |  |  |
|                                           | 6. You avoid a product if it was treated with pesticides.                                                                             |  |  |  |  |  |

|                                    |                                                                              |  |  |  |  |  |
|------------------------------------|------------------------------------------------------------------------------|--|--|--|--|--|
| Green Consumer Behavior (12 items) | 1. You buy products that come in a refillable container.                     |  |  |  |  |  |
|                                    | 2. You buy products packaged or made with recycled material.                 |  |  |  |  |  |
|                                    | 3. You buy products that are environmentally certified for the environment.  |  |  |  |  |  |
|                                    | 4. You use low energy light bulbs.                                           |  |  |  |  |  |
|                                    | 5. You buy bio-organic grown food.                                           |  |  |  |  |  |
|                                    | 6. You buy products that are biodegradable or have biodegradable containers. |  |  |  |  |  |
|                                    | 7. You buy products produced by environmentally responsible companies.       |  |  |  |  |  |
|                                    | 8. You use less air conditioning to save energy.                             |  |  |  |  |  |
|                                    | 9. You buy energy efficient appliances.                                      |  |  |  |  |  |
|                                    | 10. You use soaps/detergents without phosphates.                             |  |  |  |  |  |
|                                    | 11. You reuse office paper.                                                  |  |  |  |  |  |
|                                    | 12. You use biodegradable garbage bags at home.                              |  |  |  |  |  |
| Waste Preventer Behavior (9 items) | 1. I buy products that are produced with the least packaging possible.       |  |  |  |  |  |
|                                    | 2. I use my own bag when shopping instead of the one provided by the store.  |  |  |  |  |  |
|                                    | 3. I search for recipients that can be reused or recycled.                   |  |  |  |  |  |
|                                    | 4. I buy my fruits and vegetables without packaging.                         |  |  |  |  |  |
|                                    | 5. I buy products that can be recycled instead of single-use ones.           |  |  |  |  |  |
|                                    | 6. I try to repair products before buying new ones.                          |  |  |  |  |  |
|                                    | 7. I wash and reuse kitchen towels instead of using paper ones.              |  |  |  |  |  |
|                                    | 8. I donate old products to charities or other potential users.              |  |  |  |  |  |
|                                    | 9. I reuse containers.                                                       |  |  |  |  |  |
| Altruistic Values (5 items)        | 1. Equality.                                                                 |  |  |  |  |  |
|                                    | 2. A world at peace.                                                         |  |  |  |  |  |
|                                    | 3. Social justice.                                                           |  |  |  |  |  |
|                                    | 4. Helpful.                                                                  |  |  |  |  |  |
|                                    | 5. Loyalty.                                                                  |  |  |  |  |  |
| Biospheric Values (4 items)        | 1. Preventing pollution.                                                     |  |  |  |  |  |
|                                    | 2. Respecting the earth.                                                     |  |  |  |  |  |
|                                    | 3. Unity with nature.                                                        |  |  |  |  |  |
|                                    | 4. Protecting the environment.                                               |  |  |  |  |  |

|                              |                         |  |  |  |  |  |
|------------------------------|-------------------------|--|--|--|--|--|
| Egoistic Values<br>(4 items) | 1. Influential.         |  |  |  |  |  |
|                              | 2. Social Power.        |  |  |  |  |  |
|                              | 3. Wealthy.             |  |  |  |  |  |
|                              | 4. Authority.           |  |  |  |  |  |
| Hedonic Values<br>(7 items)  | 1. Liberty              |  |  |  |  |  |
|                              | 2. Creativity.          |  |  |  |  |  |
|                              | 3. Independency.        |  |  |  |  |  |
|                              | 4. Choice of own goals. |  |  |  |  |  |
|                              | 5. Curious.             |  |  |  |  |  |
|                              | 6. Self-Respect.        |  |  |  |  |  |
|                              | 7. Enjoying life.       |  |  |  |  |  |

**Part B: Socio-Demographic Characteristics** (Select with an X your choice).

| Question                                            | Alternatives           | Choice |
|-----------------------------------------------------|------------------------|--------|
| Gender                                              | a. Male                |        |
|                                                     | b. Female              |        |
| Household Size (number of people that live at home) | a. 1                   |        |
|                                                     | b. 2                   |        |
|                                                     | c. 3                   |        |
|                                                     | d. 4                   |        |
|                                                     | e. 5                   |        |
|                                                     | f. 6                   |        |
|                                                     | g. >6                  |        |
| Income of the family head                           | a. None                |        |
|                                                     | b. Less than 420 USD   |        |
|                                                     | c. 421 – 840 USD       |        |
|                                                     | d. 841 – 1,260 USD     |        |
|                                                     | e. 1,261 – 1,680       |        |
|                                                     | f. 1,681 – 2,100 USD   |        |
|                                                     | g. More than 2,100 USD |        |
| Age of surveyed person                              | a. <26 years old       |        |
|                                                     | b. 26-36 years old     |        |
|                                                     | c. 37-47 years old     |        |
|                                                     | d. 48-58 years old     |        |
|                                                     | e. 59-69 years old     |        |
|                                                     | f. >69 years old       |        |
| Education Level                                     | a. None                |        |
|                                                     | b. Primary School      |        |
|                                                     | c. High School         |        |
|                                                     | d. Bachelor Degree     |        |
|                                                     | e. Post-Grade          |        |

**Part C:** Big Five Personality Test (Select with an X your level of acceptance on the following items, considering that 1 is totally disagree and 5 totally agree. Begin each statement with “I....”).

| Items                                                     | 1 | 2 | 3 | 4 | 5 |
|-----------------------------------------------------------|---|---|---|---|---|
| 1. Am the life of the party.                              |   |   |   |   |   |
| 2. Feel little concern for others.                        |   |   |   |   |   |
| 3. Am always prepared                                     |   |   |   |   |   |
| 4. Get stressed out easily.                               |   |   |   |   |   |
| 5. Have a rich vocabulary.                                |   |   |   |   |   |
| 6. Don't talk a lot.                                      |   |   |   |   |   |
| 7. Am interested in people.                               |   |   |   |   |   |
| 8. Leave my belongings around.                            |   |   |   |   |   |
| 9. Am relaxed most of the time.                           |   |   |   |   |   |
| 10. Have difficulty understanding abstract ideas          |   |   |   |   |   |
| 11. Feel comfortable around people.                       |   |   |   |   |   |
| 12. Insult people                                         |   |   |   |   |   |
| 13. Pay attention to details.                             |   |   |   |   |   |
| 14. Worry about things                                    |   |   |   |   |   |
| 15. Am the life of the party                              |   |   |   |   |   |
| 16. Keep in the background.                               |   |   |   |   |   |
| 17. Sympathize with others' feelings.                     |   |   |   |   |   |
| 18. Make a mess of things                                 |   |   |   |   |   |
| 19. Seldom feel blue                                      |   |   |   |   |   |
| 20. Am not interested in abstract ideas.                  |   |   |   |   |   |
| 21. Start conversations.                                  |   |   |   |   |   |
| 22. Am not interested in other people's problems.         |   |   |   |   |   |
| 23. Get chores done right away.                           |   |   |   |   |   |
| 24. Am easily disturbed                                   |   |   |   |   |   |
| 25. Have excellent ideas                                  |   |   |   |   |   |
| 26. Have little to say                                    |   |   |   |   |   |
| 27. Have a soft heart                                     |   |   |   |   |   |
| 28. Often forget to put things back in their proper place |   |   |   |   |   |
| 29. Get upset easily                                      |   |   |   |   |   |
| 30. Do not have a good imagination                        |   |   |   |   |   |
| 31. Talk to a lot of different people at parties          |   |   |   |   |   |
| 32. Am not really interested in others                    |   |   |   |   |   |
| 33. Change my mood a lot.                                 |   |   |   |   |   |
| 34. Like order.                                           |   |   |   |   |   |
| 35. Am quick to understand things.                        |   |   |   |   |   |
| 36. Don't like to draw attention to myself.               |   |   |   |   |   |
| 37. Take time out for others.                             |   |   |   |   |   |
| 38. Shirk my duties                                       |   |   |   |   |   |
| 39. Have frequent mood swings                             |   |   |   |   |   |
| 40. Use difficult words                                   |   |   |   |   |   |
| 41. Don't mind being the center of attention.             |   |   |   |   |   |
| 42. Feel others' emotions.                                |   |   |   |   |   |
| 43. Follow a schedule                                     |   |   |   |   |   |
| 44. Get irritated easily.                                 |   |   |   |   |   |
| 45. Spend time reflecting on things.                      |   |   |   |   |   |
| 46. Am quiet around strangers                             |   |   |   |   |   |

|                              |  |  |  |  |  |
|------------------------------|--|--|--|--|--|
| 47. Make people feel at ease |  |  |  |  |  |
| 48. Am exacting in my work   |  |  |  |  |  |
| 49. Often feel blue.         |  |  |  |  |  |
| 50. Am full of ideas.        |  |  |  |  |  |

**Part D: Informed Consent**

\_\_\_\_\_(City)\_\_\_\_\_, \_\_ (Day)\_\_\_ / \_\_ (Month)\_\_\_ / \_\_ (Year)\_\_\_

**TITLE OF STUDY:**

Survey for the population of Ecuador on pro-environmental behaviors, VBN Theory, and Big Five Personality Test.

**PRINCIPAL INVESTIGATOR:**

Ing. José Hidalgo Crespo, Ph.D.

Post-Doctor

G-Scop Laboratory

Grenoble Polytechnic Institute

Jose-armando.hidalgo-crespo@grenoble-inp.fr

**PURPOSE OF STUDY**

You are being asked to take part in a research study. Before you decide to participate in this study, it is important that you understand why the research is being done and what it will involve. Please read the following information carefully. Please ask the researcher if there is anything that is not clear or if you need more information.

The purpose of this study is to understand how certain eco-psychological models can explain the development of certain waste related pro-environmental behaviors in the country, and how external influences can increase the explanatory power of this model, together with the role of personality on such connections.

**CONSENT**

I have read and understood the provided information and have had the opportunity to ask questions. I understand that my participation is voluntary and that I am free to withdraw at any

time, without giving a reason and without cost. I understand that I will be given a copy of this consent form. I voluntarily agree to take part in this study.

Participant's signature \_\_\_\_\_ Date \_\_\_\_\_

Investigator's signature \_\_\_\_\_ Date \_\_\_\_\_
